# Supplementary material for: Synthesis of glycerol carbonate over a 2D coordination polymer built with Nd3+ions and organic ligands
Source: Royal Society of Chemistry journal article supplement (doi:10.1039/c8dt01803k), 2018-01-01
Supplement: c8dt01803k1.pdf [file c8dt01803k1.pdf]

## Supplementary material

### Synthesis of glycerol carbonate over 2D coordination polymer building with Nd<sup>3+</sup> ions and organic ligand

Chris H. J. Franco<sup>1</sup>, Poliana Chagas<sup>2</sup>, Gabriela S. Caldeira<sup>3</sup>, Luiz C. A. Oliveira<sup>2</sup>, Patterson P. de Souza<sup>3</sup>, Alexandre A. Leitão<sup>1</sup>, Giovanni W. Amarante<sup>1</sup>, Renata Diniz<sup>\*1,2</sup>

<sup>1</sup> Universidade Federal de Juiz de Fora, 36036-900, Juiz de Fora, Minas Gerais, Brazil

<sup>2</sup> Universidade Federal de Minas Gerais, Av. Antônio Carlos, 6627, Belo Horizonte, Minas Gerais, Brazil. \*E-mail address: rdiniz@ufmg.br

<sup>3</sup> Centro Federal de Educação Tecnológica de Minas Gerais, Av. Amazonas, 5253, Belo Horizonte, Minas Gerais, Brazil.

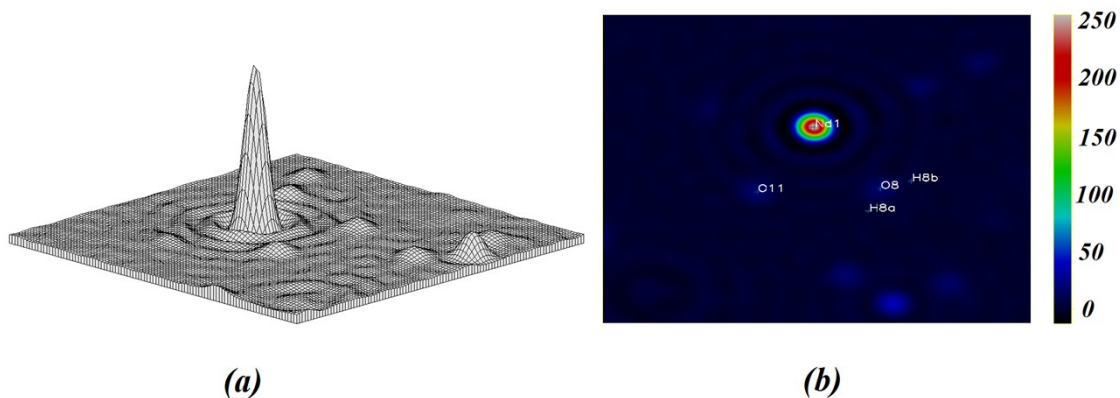

**Fig.S1.** Electron density maps observed for *Nd-5sis* around the Nd<sup>3+</sup> ions. (a) in 3D projection and (b) in 2D projection.

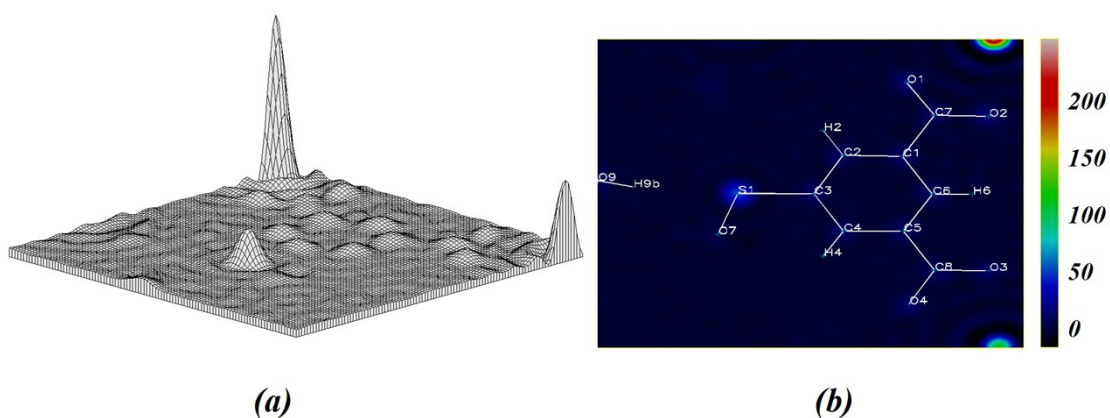

**Fig.S2.** Electron density maps observed for *Nd-5sis* around the planes of the aromatic ring of *Nd-5sis*. (a) in 3D projection and (b) in 2D projection.

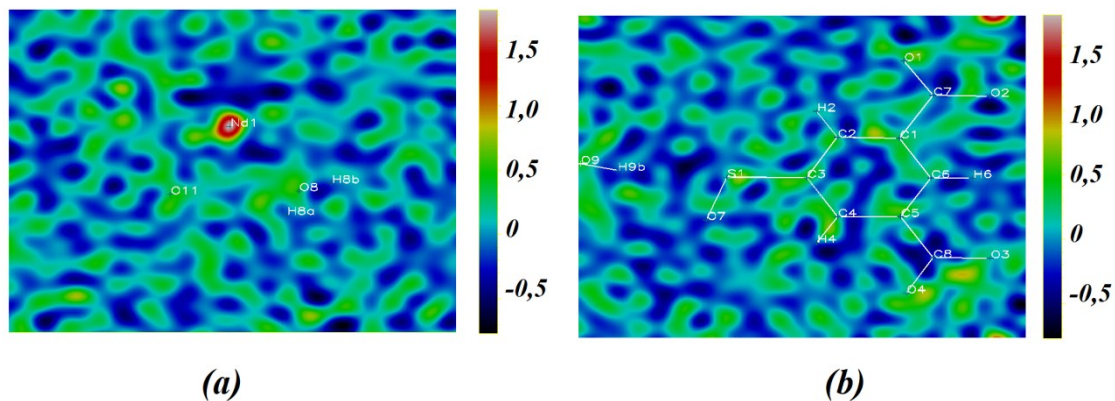

Fig.S3. Residual electronic density map of *Nd-5sis* after refinement process. (a) in 2D projection and (b) in 3D projection for  $\text{Nd}^{3+}$  ions.

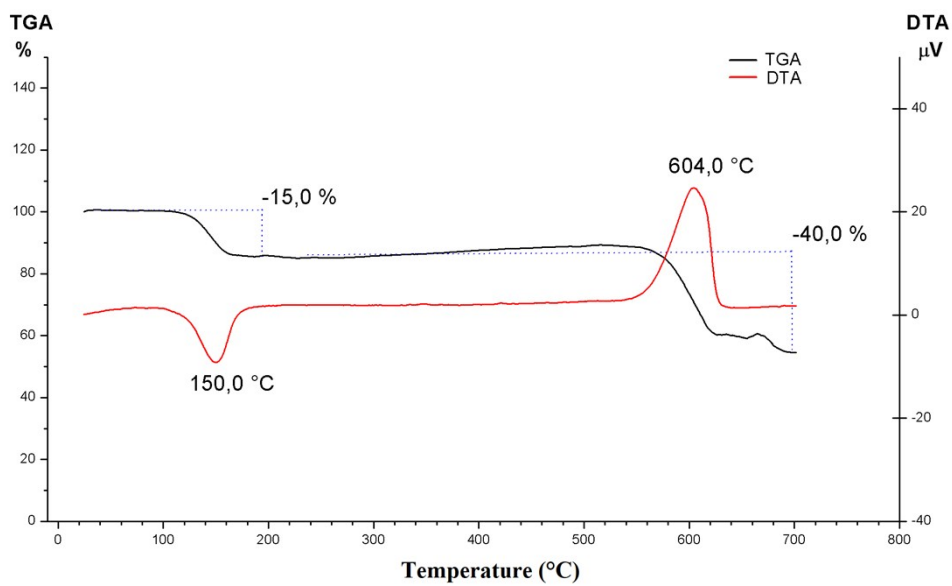

Fig.S4. Thermal analyses result for *Nd-5sis* in an air atmosphere.

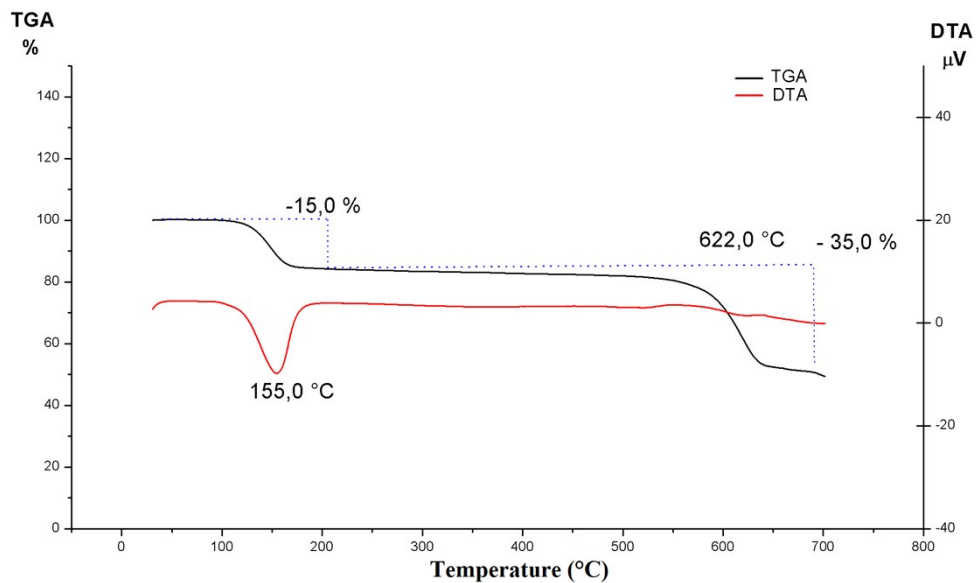

**Fig.S5.** Thermal analyses result for *Nd-5sis* in a nitrogen atmosphere.

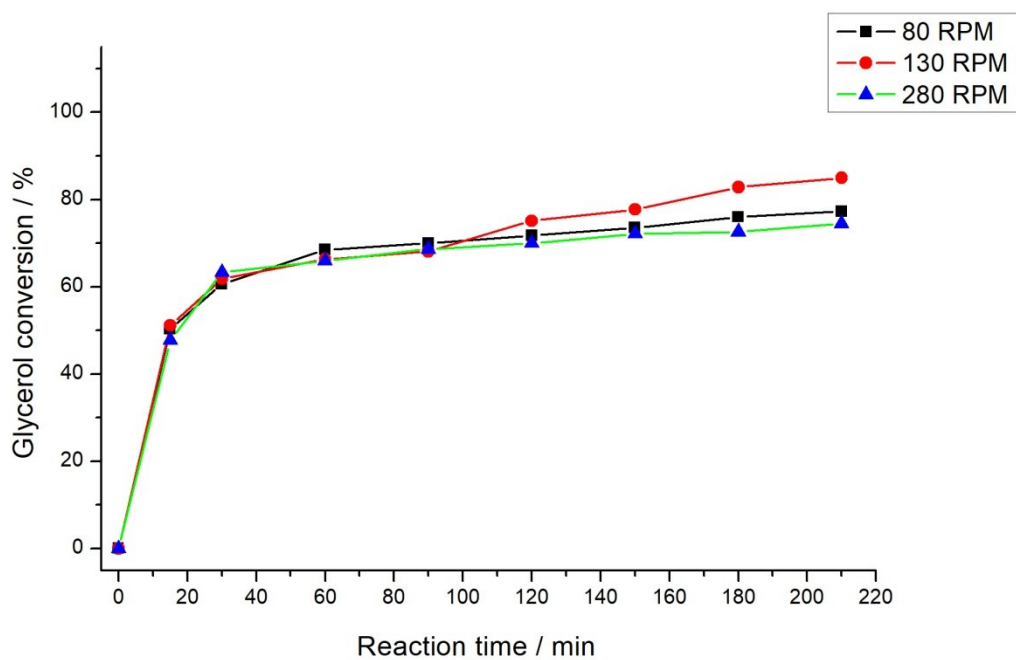

**Fig.S6.** Effect of stirring speed of the system on the glycerol conversion. Reaction conditions: 12,61 g glycerol, 8,225 g urea, 140°C, 10 KPa.

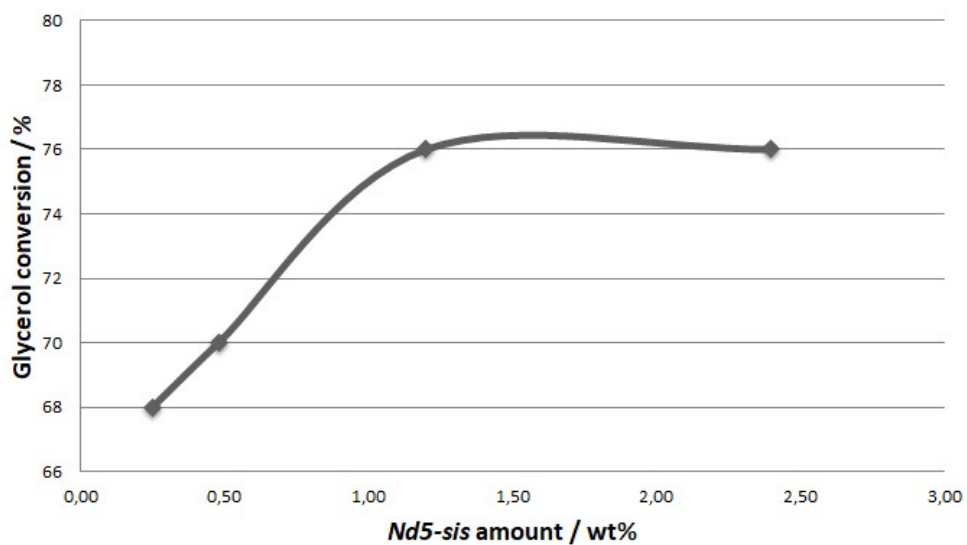

**Fig.S7.** Effect of *Nd-5sis* amount on the glycerol conversion. Reaction conditions: 12,61 g glycerol, 8,225 g urea, 1,5 h, 140°C, 10 KPa.

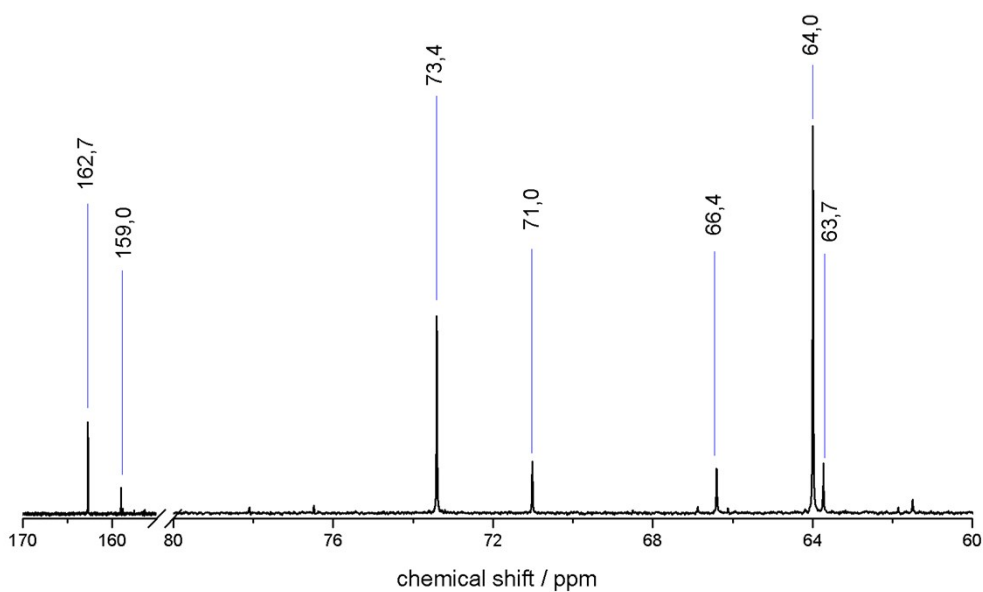

**Fig.S8.**  $^{13}\text{C}$  NMR (400 MHz, in deuterated acetone) spectrum of the reaction. The system is principally formed by glycerol, glycerol carbonate and residual urea.

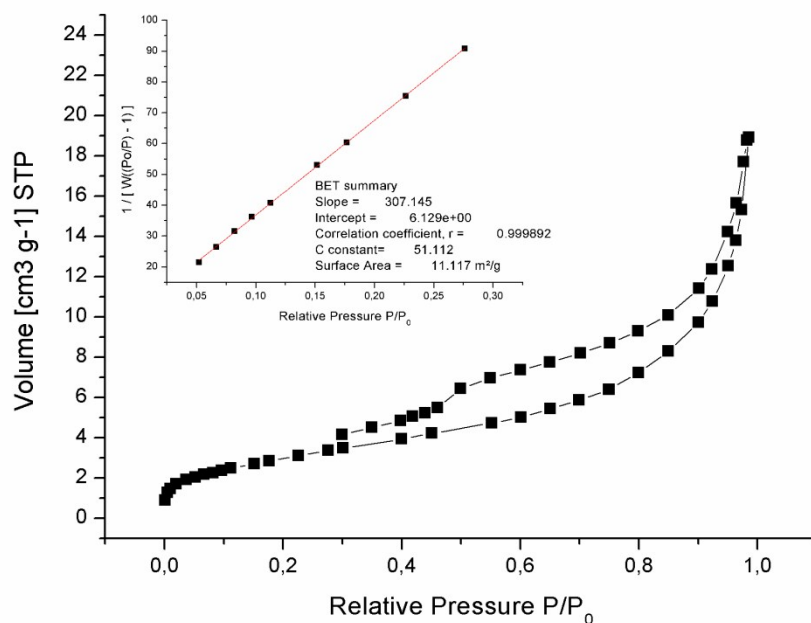

**Fig.S9.** Nitrogen adsorption/desorption isotherm at 77 K in *Nd-5sis*.

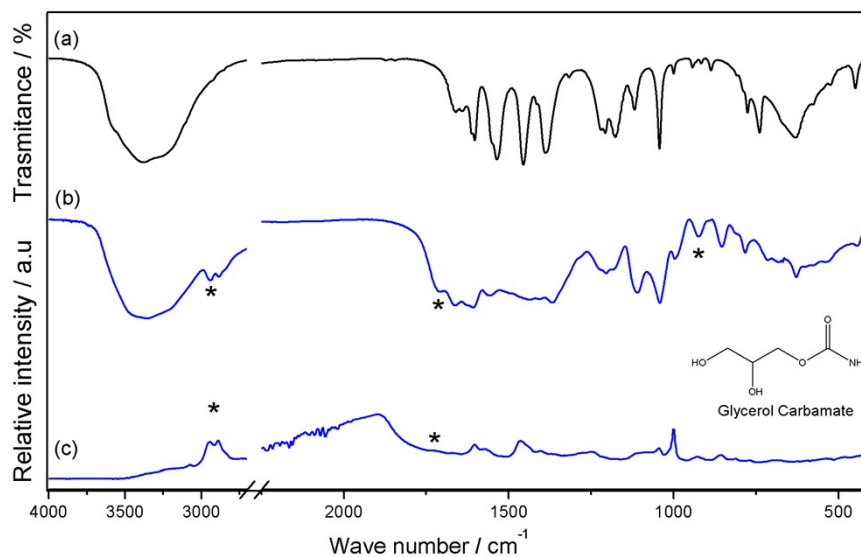

**Fig.S10.** Spectroscopic data for the *Nd-5sis* recovered. (a) *Nd-5sis* before the reaction. (b) Spectrum in the infrared region for the *Nd-5sis* after the first cycle of the reaction and (c) Raman spectrum for the *Nd-5sis* after the first cycle of the reaction. Note: Catalyst washed with water and methanol to extract excess reagents/products in the material.

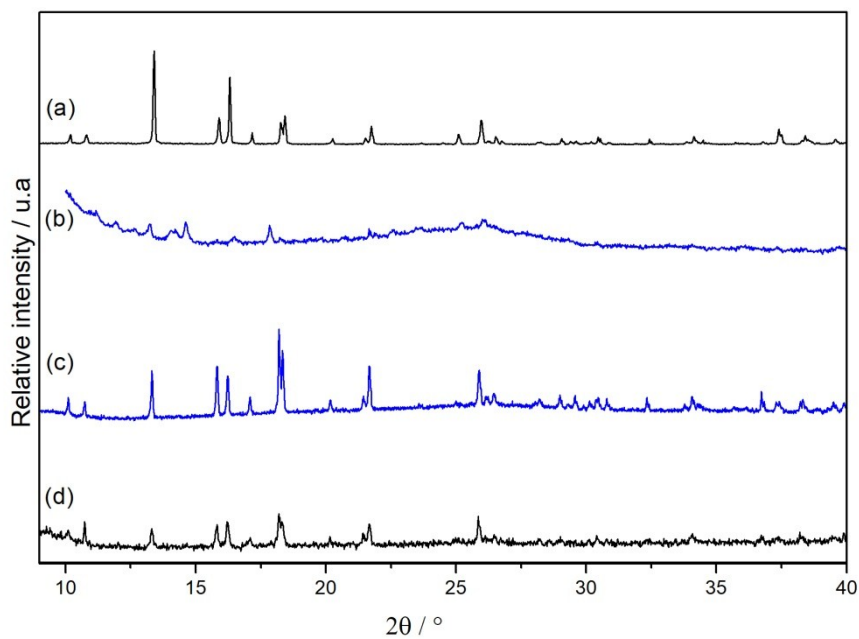

**Fig.S11.** X-ray diffraction data for the *Nd-5sis* recovered. **(a)** *Nd-5sis* before the reaction. **(b)** *Nd-5sis* after the reaction and washed with water and methanol. **(c)** *Nd-5sis* after recrystallization process with water and ethanol. **(d)** *Nd-5sis* after the fourth cycle, performed after recrystallization for six days at 160 ° C with water and ethanol.
